# Supplementary material
Source: PubMed Central journal article supplement (PMC2230668)
Supplement: 7601824s4.pdf [file 7601824s4.pdf]

Supplementary Fig. 3

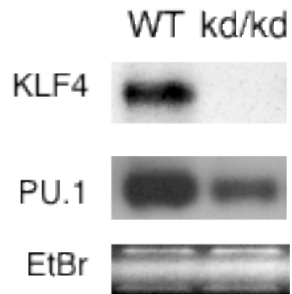

**Supplementary Fig. 3.** KLF4 expression is markedly reduced in leukemic cells that have dysregulated PU.1 expression. Northern blot analysis demonstrates KLF4 mRNA expression is absent in pre-leukemic kd/kd mice that bear an ~80% knockdown of PU.1 expression.

Supplementary Fig. 4

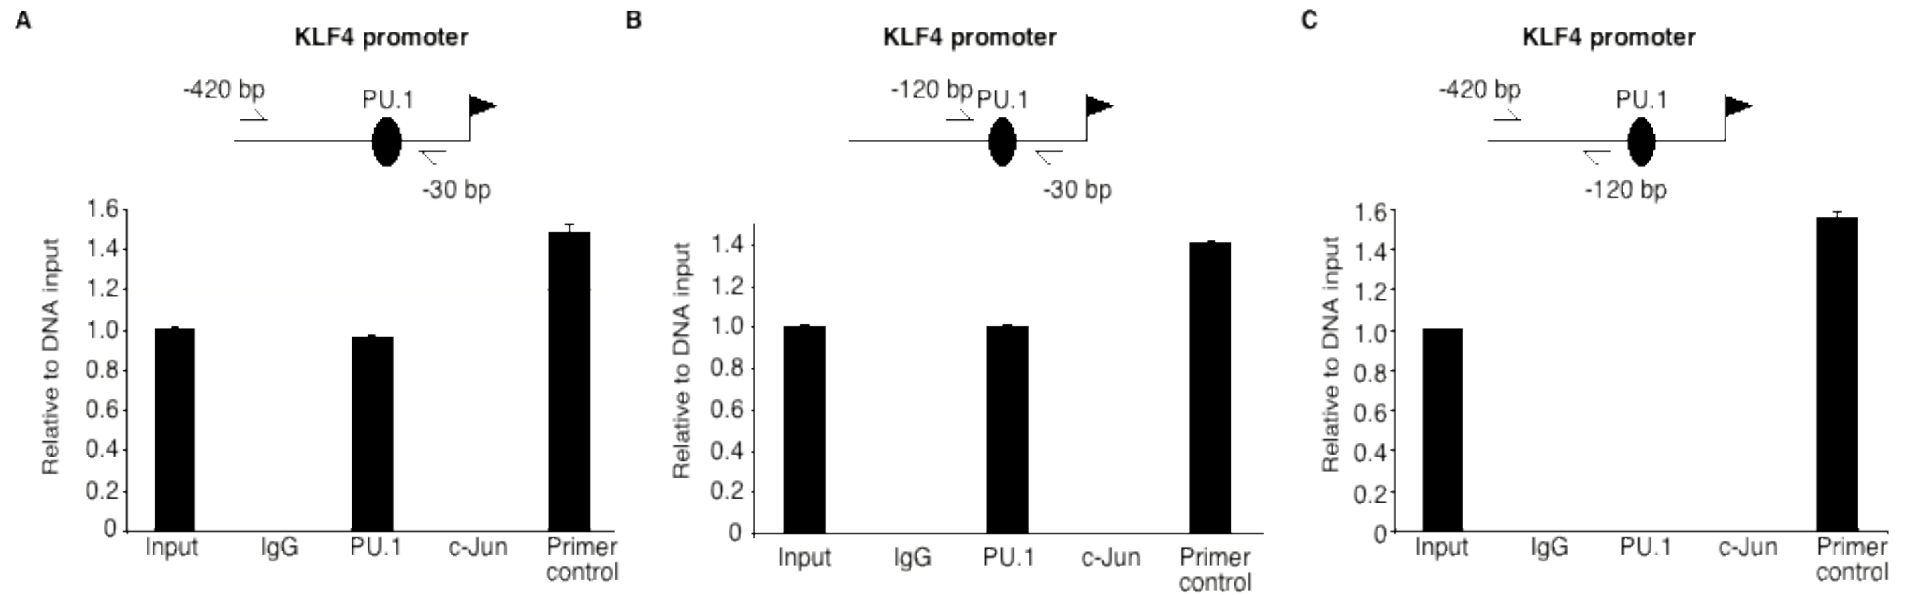

**Supplementary Fig. 4.** PU.1 binding to the KLF4 promoter. THP-1 cells were subjected to chromatin immunoprecipitation (ChIP) assays using antibodies to IgG, PU.1, or c-Jun. DNAs isolated from ChIP assays were analyzed in triplicate by quantitative real-time PCR using Brilliant SYBR Green Mix (Stratagene) and the Mx3000P real-time PCR system. Values were presented as relative to DNA input. The primer sets (A-C) were also tested on genomic DNA from THP-1 cells (Promega) as positive controls. Only primer sets inclusive of the PU.1 site of the KLF4 promoter demonstrated binding after ChIP was performed with a PU.1 antibody (A and B).
